# Supplementary material for: Salvia miltiorrhiza Alleviates Memory Deficit Induced by Ischemic Brain Injury in a Transient MCAO Mouse Model by Inhibiting Ferroptosis
Source: MDPI journal article supplement (doi:10.3390/antiox12040785), 2023-03-23
Supplement: s1 [file s1]

# ***Salvia miltiorrhiza* Alleviates Memory Deficit Induced by Ischemic Brain Injury in a Transient MCAO Mouse Model by Inhibiting Ferroptosis**

**Geon Ko <sup>1</sup>, Jinho Kim <sup>1</sup>, Yeong-Jae Jeon <sup>1</sup>, Donghun Lee <sup>2</sup>, Hyeon-Man Baek <sup>1,3,4,\*</sup> and Keun-A Chang <sup>1,4,5,\*</sup>**

<sup>1</sup> Department of Health Sciences and Technology, GAIHST, Gachon University, Incheon 21999, Republic of Korea; sirius9725@gachon.ac.kr (G.K.); qpdzhfl@gachon.ac.kr (J.K.); yeong@gachon.ac.kr (Y.-J.J.)

<sup>2</sup> Department of Herbal Pharmacology, College of Korean Medicine, Gachon University, Seongnam-si 13120, Republic of Korea; dlee@gachon.ac.kr

<sup>3</sup> Department of Molecular Medicine, College of Medicine, Gachon University, Incheon 21999, Republic of Korea

<sup>4</sup> Department of Pharmacology, College of Medicine, Gachon University, Incheon 21999, Republic of Korea

<sup>5</sup> Department of Basic Neuroscience, Neuroscience Research Institute, Gachon University, Incheon 21999, Republic of Korea

\* Correspondence: hmbaek98@gachon.ac.kr (H.-M.B.); keuna705@gachon.ac.kr (K.-A.C.); Tel.: +82-32-899-6678 (H.-M.B.); +82-32-899-6411 (K.-A.C.)

## **Supplementary Material & Methods**

### **High-Performance Liquid Chromatography (HPLC)**

Chromatographic analysis of SM was performed by the HPLC linked using an 1100 series HPLC system (Agilent, USA). Chromatographic separation was carried out at 20°C using a Zorbax EclipseXDB C18 column (4.6 x 250 mm, 5 µm, Agilent, USA). A 10 mg sample was diluted with 1 ml of 100% methanol and then, sonicated for 10 min. Samples were filtered out using a 0.2 µm syringe filter (Waters Corp., USA). The mobile phase component contained 0.1% formic acid (A) and acetonitrile (B) and the column was flowed out as follows: 0-10 min, 10-20%; 10-27 min, 20-33%; 27-30 min, 33-70%; 30-50 min, 85% solvent (B). A 10 µL injection volume was used to mark the run-off at 280 nm.

### **Quantification of brain edema**

After TTC staining, brain edema was quantified by analyzing the area of four slices of brain tissues from the contralateral and ipsilateral hemispheres of both the tMCAO-V and tMCAO-SM groups using image J 1.50 software. The brain edema (%) was calculated as  $[(\text{ipsilateral hemisphere} - \text{contralateral hemisphere}) / \text{contralateral hemisphere}] (\%) - 100$ .

### **Diaminobenzidine- (DAB-) Enhanced Perls' Staining**

Perls' staining was performed as previously described [1]. Briefly, brain tissues were washed 3 times with PBS (phosphate-buffered saline) for 5mins each. Then, brain sections were incubated in the Perls' staining solution (5% potassium ferrocyanide [sigma Aldrich, ST. Louis, MO, USA] + 10% hydrochloric acid [sigma Aldrich]) for 1 hours. After washing 3 times (5 min each) with PBS, endogenous peroxidase activity was quenched for 20 min at room temperature in 0.3% H<sub>2</sub>O<sub>2</sub> in methanol, followed by washing with PBS five times. Brain sections were stained with DAB (3,3'-diaminobenzidine) Horseradish Peroxidase for 3 min. Brain sections were placed on a glass slide. A cover glass was mounted on the sections.

Supplementary figures

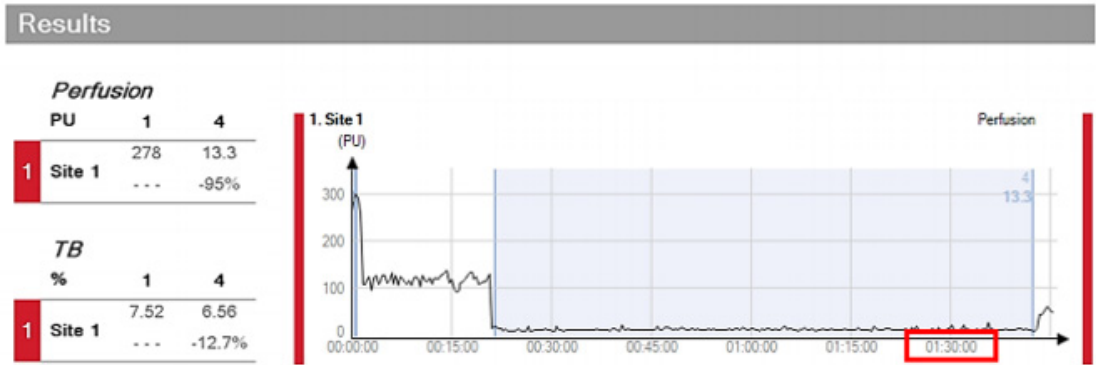

Figure S1. Blood flow tracking by Laser doppler blood flowmeter

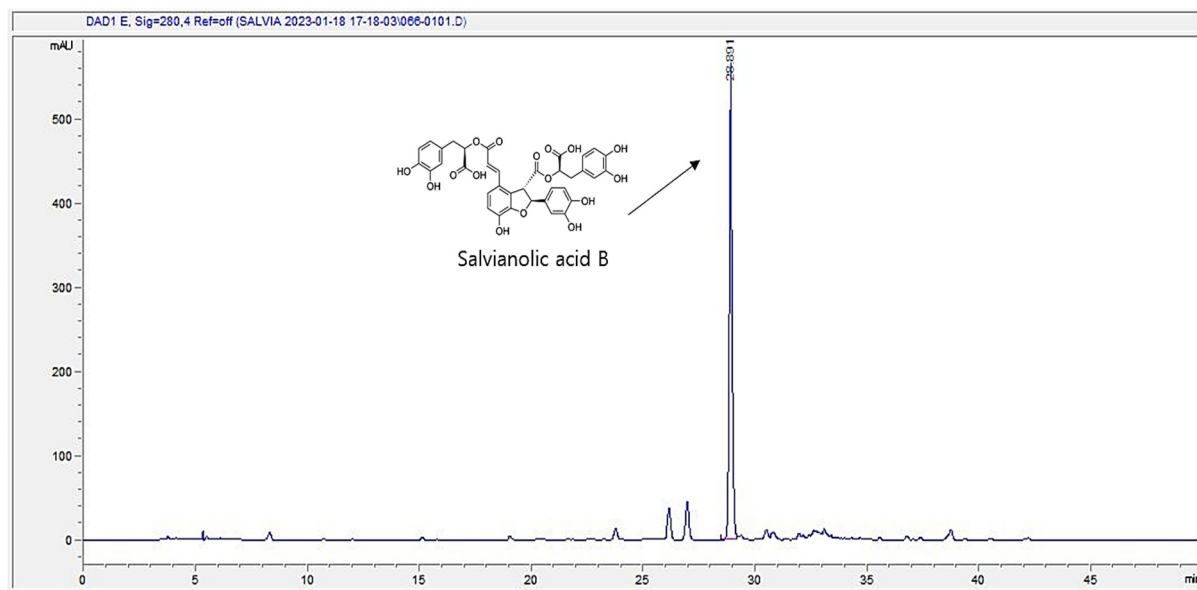

**Figure S2. Analysis of SM using High-Performance Liquid Chromatography (HPLC).**

10 mg sample was diluted in 1 ml of methanol and sonicated for 10 min. Samples were filtered through a 0.2  $\mu\text{m}$  syringe filter (Waters Corp., USA). The mobile phase composition was 0.1% formic acid (A) and acetonitrile (B) and the column was eluted as follows: 0–10 min, 10–20%; 10–27 min, 20–33%; 27–30 min, 33–70%; 30–50 min, 85% solvent (B) with a flow rate of 1.0 ml/min. The outflow was indicated at 280 nm using an injection volume of 10  $\mu\text{L}$ .

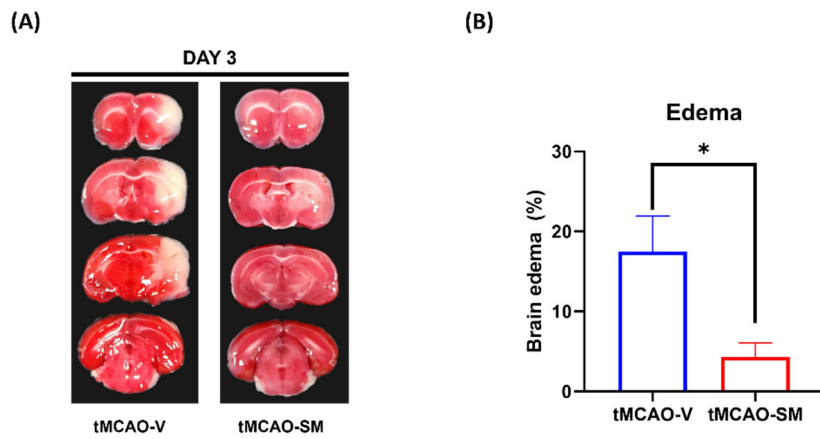

**Figure S3. Quantification of brain edema in tMCAO-V and tMCAO-SM groups on day 3**

(A) TTC staining and (B) brain edema ratio (%) was compared between tMCAO-V and tMCAO-SM groups, 3 days after tMCAO induction. Statistical analysis between the two groups was performed using unpaired t test.  $*p < 0.05$ .

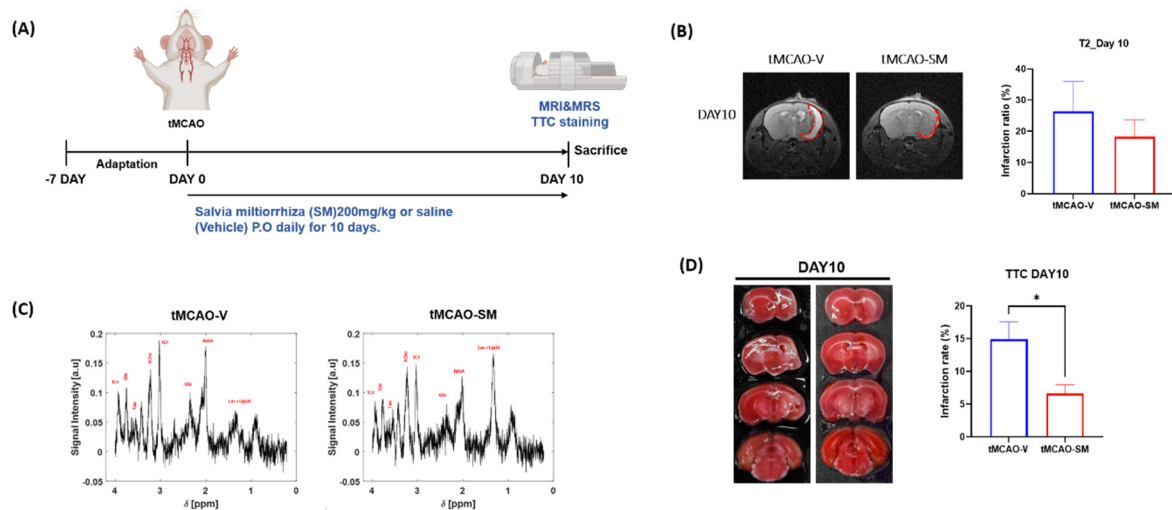

**Figure S4. SM alleviates cerebral I/R injury in MRI T2 imaging on day 10.**

(A) Experimental scheme. After inducing tMCAO, mice were orally administered the saline or SM for 10 days, tMCAO mice were taken MRI T2 imaging and MRS to analyze how much cerebral I/R injury occurred and recovered. (B) MRI T2 imaging and (C) MRS analysis in tMCAO-V and tMCAO-SM groups on day10. (D) TTC staining and quantification of infarction ratio between tMCAO-V and tMCAO-SM groups 10 days after tMCAO. (tMCAO-V, n=5-6; tMCAO-SM, n=4-7). Statistical analysis between the two groups was performed using unpaired t test.  $*p<0.05$ .

(A)

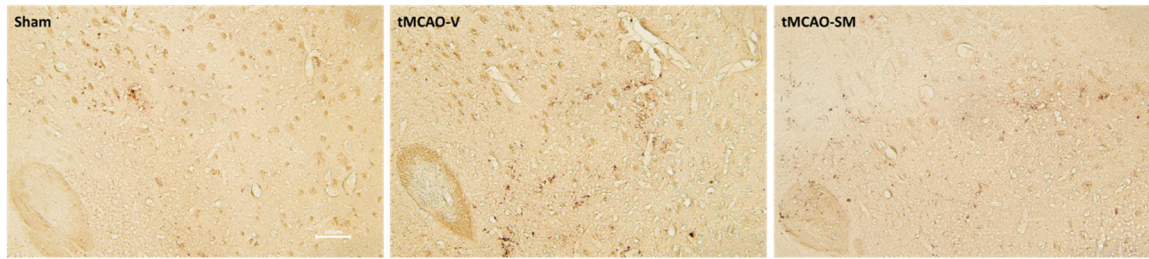

(B)

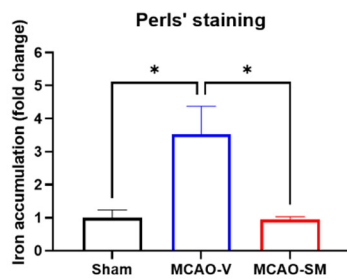

**Figure S5. SM reduced iron accumulation in tMCAO mouse brain.**

(A) Representative image of Perls' staining in Sham, tMCAO-V, tMCAO-SM groups. Scale bar, 100  $\mu$ m

(B) Quantification of iron accumulation in penumbra area of striatum of the tMCAO mouse brain by DAB-enhanced Perls' staining. (Sham, n=3; tMCAO-V, n=4; tMCAO-SM, n=5) Statistical analysis between the three groups was performed using the one-way ANOVA followed by Tukey's multiple comparisons test. \* $p<0.05$ .

## Reference

1. Bao, W.D.; Pang, P.; Zhou, X.T.; Hu, F.; Xiong, W.; Chen, K.; Wang, J.; Wang, F.; Xie, D.; Hu, Y.Z.; et al. Loss of ferroportin induces memory impairment by promoting ferroptosis in Alzheimer's disease. *Cell Death Differ* **2021**, *28*, 1548-1562, doi:10.1038/s41418-020-00685-9.
